# Supplementary material for: Grazing-incidence X-ray diffraction elucidates structural correlations in fluid monolayers of lipids and surfactants
Source: Royal Society of Chemistry journal article supplement (doi:10.1039/d4nr04198d), 2024-12-09
Supplement: d4nr04198d1.pdf [file d4nr04198d1.pdf]

# Grazing-incidence x-ray diffraction elucidates structural correlations in fluid lipid and surfactant monolayers

## – Supporting Information –

Joshua Reed,<sup>†</sup> Miriam Grava,<sup>†</sup> Gerald Brezesinski,<sup>†</sup> Chen Shen,<sup>‡</sup> and  
Emanuel Schneck<sup>\*,†</sup>

<sup>†</sup>*Institute for Condensed Matter Physics, Technische Universität Darmstadt, Hochschulstrasse 8,  
64289 Darmstadt, Germany*

<sup>‡</sup>*Deutsches Elektronen-Synchrotron DESY, Notkestrasse 85, 22607 Hamburg, Germany*

E-mail: emanuel.schneck@pkm.tu-darmstadt.de

## Electron density layer model parameters as determined by GIXOS

Table S1: Parameters of the HC and HG layer in the electron density profiles as obtained by GIXOS. <sup>a</sup>Fixed according to our earlier work (refs. <sup>1,2</sup>). <sup>b</sup>In good agreement with the value reported earlier for a different surfactant (ref. <sup>3</sup>).

| param. / $\Pi$ (mN/m)                                    | DMPC              |                   |                   |                   | POPC              |                   |                   | C <sub>12</sub> DMPO |
|----------------------------------------------------------|-------------------|-------------------|-------------------|-------------------|-------------------|-------------------|-------------------|----------------------|
|                                                          | 10                | 20                | 30                | 35                | 10                | 20                | 30                | 43                   |
| $\sigma_{\text{air/HC}}$ [ $\text{\AA}$ ] ( $\pm 0.5$ )  | 2.5               | 2.6               | 2.6               | 2.7               | 2.7               | 2.7               | 2.7               | 2.0                  |
| $d_{\text{HC}}$ [ $\text{\AA}$ ] ( $\pm 0.5$ )           | 9.2               | 10.7              | 11.6              | 12.1              | 10.7              | 12.0              | 13.0              | 6.3                  |
| $\rho_{\text{HC}}$ [ $e^-/\text{\AA}^3$ ]                | 0.30 <sup>a</sup> | 0.26 <sup>b</sup>    |
| $\sigma_{\text{HC/HG}}$ [ $\text{\AA}$ ] ( $\pm 0.5$ )   | 3.6               | 2.2               | 2.2               | 2.2               | 2.7               | 2.2               | 2.3               | 2.3                  |
| $d_{\text{HG}}$ [ $\text{\AA}$ ] ( $\pm 0.5$ )           | 7.6               | 8.0               | 8.0               | 8.3               | 7.1               | 7.8               | 8.0               | 8.5                  |
| $\rho_{\text{HG}}$ [ $e^-/\text{\AA}^3$ ] ( $\pm 0.02$ ) | 0.43              | 0.43              | 0.44              | 0.45              | 0.39              | 0.41              | 0.45              | 0.35                 |
| $\sigma_{\text{HG/wat}}$ [ $\text{\AA}$ ] ( $\pm 0.5$ )  | 1.8               | 1.7               | 1.8               | 1.8               | 1.6               | 1.5               | 2.1               | 2.3                  |

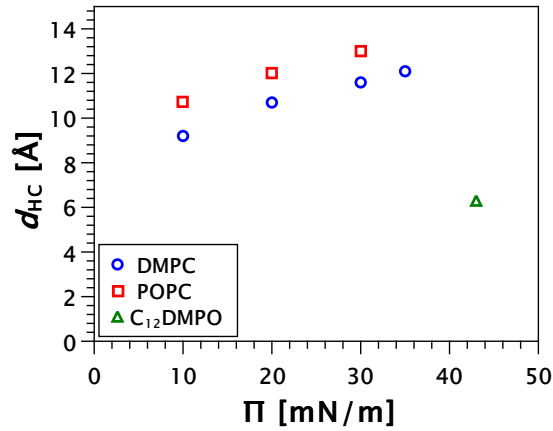

Figure S1: Hydrocarbon chain layer thickness  $d_{HC}$  of DMPC, POPC, and C<sub>12</sub>DMPO monolayers as obtained by GIXOS as a function of the lateral pressure  $\Pi$ .

## Total measured peak intensity

We define the measured total peak intensity  $I_{tot}^m$  as the product of the peak height and the peak widths in  $Q_{xy}$  and  $Q_z$  directions,  $I_{tot}^m = I_{max} w_{xy} w_z$ . In Fig. S2,  $I_{tot}^m$  is plotted as a function of  $f_c/A_{mol}^a$ . The linear relation between  $I_{tot}^m$  and  $f_c/A_{mol}^a$  is indicated with a linear fit through the origin.

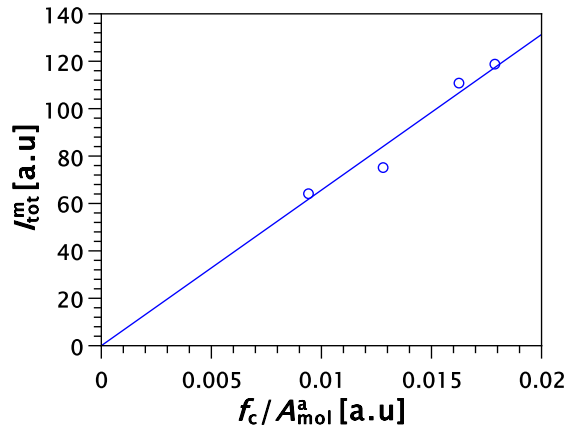

Figure S2: Representative comparison of the measured and predicted peak intensities for DMPC. The straight solid line through the origin is a linear fit of the data points.

## Compression moduli $K_A^c$ and $K_A$ of ordered monolayers

Octadecanol is a prime example to discuss the lateral compressibility of highly ordered monolayers. The phase behavior of octadecanol monolayers at the air/water interface has been studied by standard isotherm experiments, Brewster-angle microscopy (BAM), and GIXD.<sup>4-8</sup> At low  $\Pi$ , the molecules are tilted in the next-nearest neighbor direction (both diffraction peaks are located at  $Q_z \neq 0$ ). Above the tilting transition, the S phase, characterized by non-tilted molecules arranged in a centered rectangular (distorted hexagonal) lattice (two diffraction peaks at  $Q_z = 0$ ), is formed at low temperatures. At higher temperatures, only one first-order diffraction peak (LS phase) can be seen in the powder pattern. The LS phase is optically isotropic.<sup>9</sup> Although there is no direct evidence of hexatic order, there are several indirect arguments in favor of such attribution.<sup>10</sup> The lateral compressibility of octadecanol monolayers has been determined in the isotropic LS phase<sup>8</sup> from measurements of  $A_{\text{mol}}^c(\Pi)$ , where the compression modulus  $K_A^c(\Pi)$  can also be expressed according to Eq. 7 in the main text. The data can be compared with  $K_A(\Pi)$  reconstructed from the isotherm  $\Pi(A_{\text{mol}}^a)$  provided in reference.<sup>4</sup> Both data sets were obtained at  $T = 20$  °C. Fig. S3 A compares  $\Pi(A_{\text{mol}}^c)$  and  $\Pi(A_{\text{mol}}^a)$ , where always  $A_{\text{mol}}^c \leq A_{\text{mol}}^a$  at the same pressure, as expected. The ordered fraction,  $f_o$ , has been calculated by using Eq. 6 (main text) and is presented in Fig. S3 B as a function of  $\Pi$ . The ordered fraction increases almost linearly with  $\Pi$ . Interestingly,  $f_o$  is at all pressures very close to 1. This shows, that the defects make up not more than 3-4% of the total monolayer area even at the lowest pressure. For monolayers undergoing the direct transition from the gaseous phase to a condensed phase (re-sublimation), the condensed islands are already formed during spreading. The defects will therefore depend on the solvent and the spreading conditions. No annealing procedure has been applied in both studies.<sup>4,8</sup>

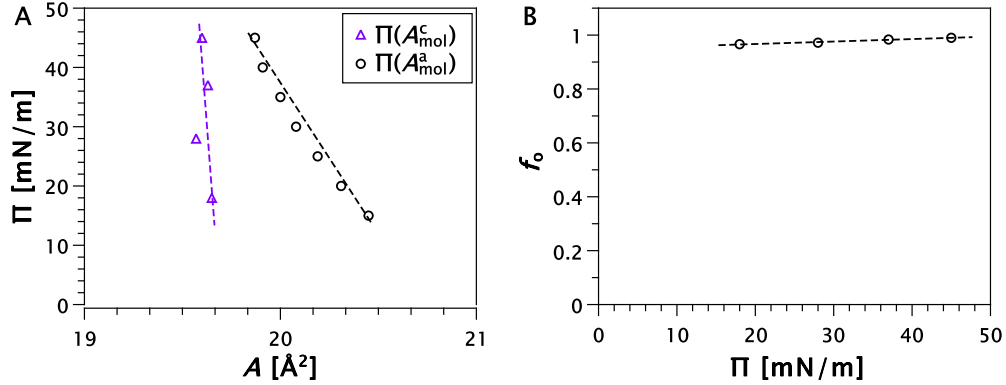

Figure S3: (A)  $\Pi(A_{\text{mol}}^a)$  and  $\Pi(A_{\text{mol}}^c)$  for octadecanol monolayers at  $T = 20^\circ\text{C}$  in the isotropic LS phase. Dashed lines are linear fits from which  $K_A$  and  $K_A^c$  are deduced. (B) The ordered fraction  $f_0$  as a function of the lateral pressure  $\Pi$ .

The compression moduli  $K_A^c(\Pi)$  and  $K_A(\Pi)$  are compared in Fig. S4. In contrast to the LE phase, in which the compression modulus  $K_A^c$  decreases gradually with increasing pressure,  $K_A^c$  virtually does not change with compression (variations in  $\Pi$ ), indicating that the packing density of the octadecanol molecules in the isotropic LS phase is not influenced by compression. Looking at the numbers at high  $\Pi$ ,  $K_A^c$  is roughly 150 times larger in the LS phase compared to the LE phase.  $K_A$  decreases only marginally upon compression in the LS phase. Remarkably,  $K_A$  is significantly smaller (factor of 15) than  $K_A^c$ . Even if the defects make up only few % of the total area, they obviously have a large influence on  $K_A$ .

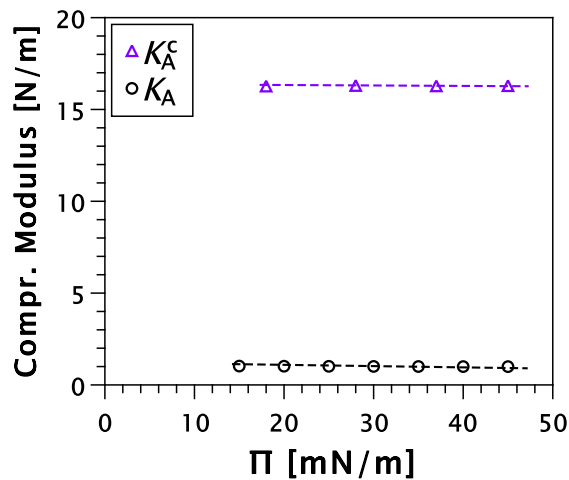

Figure S4: Compression moduli  $K_A$  and  $K_A^c$  of an octadecanol monolayer at  $20^\circ\text{C}$  in the isotropic LS phase.

## Average number of phospholipids in a structurally correlated region

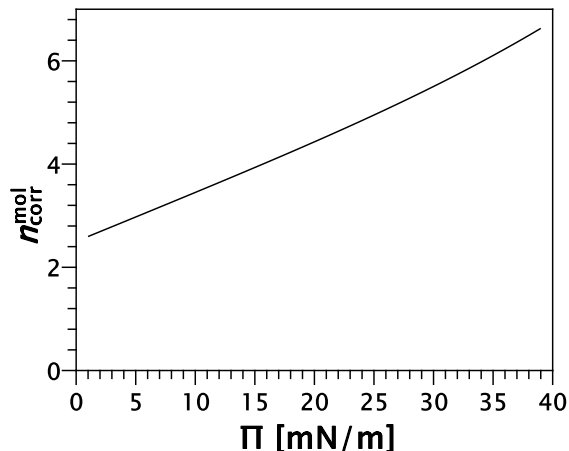

Figure S5: Average number of phospholipids in a structurally correlated region,  $n_{\text{mol}}^{\text{corr}}$ , as a function of the lateral pressure  $\Pi$ . The curve is derived from Eqs. 3 - 5 and from the linear fit in Fig. 6 D (all in the main text), as  $n_{\text{mol}}^{\text{corr}}(\Pi) = A_{\text{corr}}(\Pi)/A_{\text{mol}}^{\text{c}}(\Pi)$ .

## Determination of $A_{\text{mol}}^{\text{a}}$ of $\text{C}_{12}\text{DMPO}$ at $\Pi = 43$ mN/m with total-reflection x-ray fluorescence (TRXF)

$A_{\text{mol}}^{\text{a}} \approx 35.5 \text{ \AA}^2$  was obtained according to Eq. (5) in ref.<sup>11</sup> from our measurements at the beam-line P08 of storage ring PetraIII with a setup described in ref.<sup>2</sup> The reference system for the P fluorescence intensity calibration was a Langmuir monolayer of 1,2-distearoyl-*sn*-glycero-3-phosphocholine (DSPC) at  $\Pi = 30$  mN/m, and for exclusion layer thickness for  $\text{C}_{12}\text{DMPO}$  we assumed  $d = d_{\text{HC}} = 0.6$  nm (see Table S1 and ref.<sup>12</sup> for further details).

## Meta-stability of lipid monolayers in the LC phase

The equilibrium spreading pressure ( $\Pi_{\text{eq}}$ ) is an experimental value based on the true thermodynamic equilibrium (in terms of equal chemical potential) between a monolayer and its solid bulk

form at the air/liquid interface. The conditions at which spreading occurs depend on the particular crystal structure of the amphiphile. Phosphatidylcholine lipids are exceptional as they only commence spreading as chain-melting occurs. With water-insoluble fatty acids and alcohols it has been well established<sup>13</sup> that  $d\Pi_{\text{eq}}/dT$  changes sign when chain melting occurs. The maximum equilibrium spreading pressure of monolayers of fatty acid esters coincides with the melting temperatures.<sup>14</sup> The determination of  $\Pi_{\text{eq}}$  is important because it signifies the pressure at which spread monolayers become thermodynamically unstable with respect to the corresponding bulk lipid phase. Compressing the monolayer to surface pressures above  $\Pi_{\text{eq}}$  leads to the monolayer collapse and the formation of the surfactant bulk phase.<sup>15</sup> However, the kinetics of this collapse can be extremely slow so that monolayers can be over-compressed to form meta-stable films. When the bulk phase is liquid-like, collapse usually occurs at  $\Pi_{\text{eq}}$  and the monolayers cannot be significantly over-compressed. In contrast, when the bulk lipid is crystalline, an activation energy to collapse first has to be overcome, which often allows for a considerable over-compression of the monolayer. This is why monolayers of phosphatidylcholine lipids in the LC phase can be typically compressed to very high lateral pressures.<sup>16,17</sup>

## References

- (1) Grava, M.; Ibrahim, M.; Sudarsan, A.; Pusterla, J.; Philipp, J.; Rädler, J. O.; Schwierz, N.; Schneck, E. Combining molecular dynamics simulations and x-ray scattering techniques for the accurate treatment of protonation degree and packing of ionizable lipids in monolayers. The Journal of Chemical Physics **2023**, *159*, 154706.
- (2) Mortara, L.; Mukhina, T.; Chaimovich, H.; Brezesinski, G.; van der Vegt, N. F.; Schneck, E. Anion Competition at Positively Charged Surfactant Monolayers. Langmuir **2024**,
- (3) Kanduč, M.; Schneck, E.; Stubenrauch, C. Intersurfactant H-bonds between head groups of n-dodecyl- $\beta$ -d-maltoside at the air-water interface. Journal of colloid and interface science **2021**, *586*, 588–595.

- (4) Lawrie, G.; Barnes, G. Octadecanol monolayers: the phase diagram. Journal of colloid and interface science **1994**, 162, 36–44.
- (5) Lautz, C.; Fischer, T. M. Discontinuities in the Tilt Angle of Octadecanol Langmuir Monolayers As Observed with Brewster Angle Autocorrelation Spectroscopy. The Journal of Physical Chemistry B **1997**, 101, 8790–8793.
- (6) Brezesinski, G.; Kaganer, V.; Möhwald, H.; Howes, P. Structure of octadecanol monolayers: An x-ray diffraction study. The Journal of chemical physics **1998**, 109, 2006–2010.
- (7) Kaganer, V.; Brezesinski, G.; Möhwald, H.; Howes, P.; Kjaer, K. Positional order in Langmuir monolayers. Physical review letters **1998**, 81, 5864.
- (8) Kaganer, V.; Brezesinski, G.; Möhwald, H.; Howes, P.; Kjaer, K. Positional order in Langmuir monolayers: An x-ray diffraction study. Physical Review E **1999**, 59, 2141.
- (9) Riviere, S.; Hénon, S.; Meunier, J.; Schwartz, D. K.; Tsao, M.-W.; Knobler, C. M. Textures and phase transitions in Langmuir monolayers of fatty acids. A comparative Brewster angle microscope and polarized fluorescence microscope study. The Journal of chemical physics **1994**, 101, 10045–10051.
- (10) Kaganer, V. M.; Möhwald, H.; Dutta, P. Structure and phase transitions in Langmuir monolayers. Reviews of Modern Physics **1999**, 71, 779.
- (11) Mukhina, T.; Pabst, G.; Ruyschaert, J.-M.; Brezesinski, G.; Schneck, E. pH-Dependent physicochemical properties of ornithine lipid in mono- and bilayers. Physical Chemistry Chemical Physics **2022**, 24, 22778–22791.
- (12) Brezesinski, G.; Schneck, E. Investigating ions at amphiphilic monolayers with X-ray fluorescence. Langmuir **2019**, 35, 8531–8542.
- (13) Gaines Jr, G. L. Insoluble monolayers at liquid-gas interfaces. Wiley-Interscience, New York **1966**,

- (14) Rettig, W.; Kuschel, F. A first-order transition between the liquid-expanded and the liquid-condensed phases in insoluble monolayers of fatty acid esters as detected by measurement of equilibrium spreading pressure. Journal of colloid and interface science **1990**, 140, 169–174.
- (15) Phillips, M.; Hauser, H. Spreading of solid glycerides and phospholipids at the air—water interface. Journal of Colloid and Interface Science **1974**, 49, 31–39.
- (16) Joos, P.; Demel, R. The interaction energies of cholesterol and lecithin in spread mixed monolayers at the air-water interface. Biochimica et Biophysica Acta (BBA)-Biomembranes **1969**, 183, 447–457.
- (17) Watkins, J. The surface properties of pure phospholipids in relation to those of lung extracts. Biochimica et Biophysica Acta (BBA)-Lipids and Lipid Metabolism **1968**, 152, 293–306.
